# Supplementary material for: Heavy pnictogen chalcohalides: the synthesis, structure and properties of these rediscovered semiconductors
Source: Royal Society of Chemistry journal article supplement (doi:10.1039/c8cc05149f), 2018-01-01
Supplement: c8cc05149f1.pdf [file c8cc05149f1.pdf]

## Heavy pnictogen chalcogenides: synthesis, structure and properties of rediscovered semiconductors

Ewelina Właźlak,<sup>a,b,\*</sup> Andrzej Blachecki,<sup>a,c</sup> Magdalena Bisztyga-Szklarz,<sup>a</sup> Sylwia Klejna,<sup>a</sup> Tomasz Mazur,<sup>a</sup> Krzysztof Mech,<sup>a\*</sup> Kacper Pilarczyk,<sup>a</sup> Dawid Przychyna,<sup>a,d</sup> Maciej Suhecki,<sup>a,d</sup> Piotr Zawal,<sup>a,d</sup> Konrad Szaciłowski<sup>a,\*</sup>

### Electronic supplementary information

**Table S1.** Computed with various methods band gaps, electron and hole effective masses, ionization potentials, electron affinities and static dielectric constants for bulk 15 group oxyhalides and chalcogenides.

|          | Space Group<br>(International<br>S. G.<br>number)    | $E_g$ [eV] | $E_g$ direct<br>[eV] | $m_{\text{eff}}(\text{e})$ [me] | $m_{\text{eff}}(\text{h})$<br>[me] | IP    | EA   | Ionic<br>Dielectric<br>constant<br>$\epsilon_r$ | Method                        |
|----------|------------------------------------------------------|------------|----------------------|---------------------------------|------------------------------------|-------|------|-------------------------------------------------|-------------------------------|
| Sb-O-F   | <i>Pnma</i>                                          | 4.33       | 4.72                 | 1.94                            | 1.23                               | 20.49 |      |                                                 | HSE+SOC <sup>169</sup>        |
| Sb-O-Cl  | <i>P2<sub>1</sub>/C</i>                              |            | 4.02                 | 1                               | 2.66                               | 19.68 |      |                                                 | HSE+SOC <sup>169</sup>        |
| Sb-S-Cl  | <i>Pnam</i> (62)                                     | 2.18       | 2.51                 |                                 |                                    |       |      |                                                 | EPM <sup>199</sup>            |
|          |                                                      | 2.31       | 2.73                 | 0.51                            | 0.64                               | 5.80  | 3.37 |                                                 | HSE06-SOC <sup>198</sup>      |
|          |                                                      | 2.53       |                      | 0.10                            | 0.32                               |       |      |                                                 | QSGW-SOC <sup>198</sup>       |
| Sb-S-Br  |                                                      | 2.21       | 1.72                 | 0.26                            | 0.57                               |       |      |                                                 | EV-SOC <sup>173</sup>         |
|          |                                                      | 1.57       |                      |                                 |                                    |       |      |                                                 | SR-GGA <sup>211</sup>         |
|          |                                                      | 2.16       |                      | 0.52                            | 3.6                                |       |      |                                                 | NCPP-PBE-GW <sup>200</sup>    |
|          |                                                      | 2.29       | 2.32                 |                                 |                                    |       |      | 105.15                                          | HSE+SOC <sup>169</sup>        |
|          | <i>Pna2<sub>1</sub></i> (33)                         | 2.21       |                      |                                 |                                    |       |      |                                                 | (GGA)E-V + SOC <sup>228</sup> |
| Sb-S-I   | <i>Pnam</i> (62)                                     | 2.11       |                      |                                 |                                    |       |      |                                                 | EPM <sup>199</sup>            |
|          |                                                      | 1.82       | 2.07                 | 0.53                            | 1.39                               |       |      | 37.28                                           | HSE+SOC <sup>169</sup>        |
|          |                                                      | 2.05       |                      |                                 |                                    |       |      |                                                 | (GGA)E-V + SOC <sup>228</sup> |
|          |                                                      | 1.445      |                      |                                 |                                    |       |      |                                                 | LDA + PAW <sup>177</sup>      |
|          |                                                      | 1.28       |                      |                                 |                                    |       |      |                                                 | PAW-PBE-SOC <sup>171</sup>    |
|          | <i>P2<sub>1</sub>2<sub>1</sub>2<sub>1</sub></i> (19) | 1.45       | 1.46                 | 0.91                            | 2.84                               |       |      | 31.59                                           | PAW-PBE-SOC <sup>171</sup>    |
|          | <i>Pna2<sub>1</sub></i> (33)                         | 1.45       | 1.60                 | 1.31                            | 2.06                               |       |      | 69.72                                           | PAW-PBE-SOC <sup>171</sup>    |
|          |                                                      | 2.11       | 1.60                 | 1.25                            | 2.06                               |       |      | 69.38                                           | HSE06-SOC <sup>198</sup>      |
|          |                                                      | 2.22       | 2.31                 |                                 |                                    | 5.37  | 3.15 |                                                 | QSGW-SOC <sup>198</sup>       |
|          |                                                      | 2.05       | 2.42                 | 0.43                            | 0.57                               |       |      |                                                 | EV-SOC <sup>173</sup>         |
|          |                                                      | 1.51       |                      | 0.07                            | 0.098                              |       |      |                                                 | SR-GGA <sup>211</sup>         |
|          |                                                      | 1.45       | 1.66                 | 0.21                            | 0.27                               |       |      |                                                 | NCPP-LDA <sup>237</sup>       |
|          | <i>Pna2<sub>1</sub></i> (33)                         | 1.49       | 1.56                 |                                 |                                    |       |      |                                                 | NCPP-LDA <sup>413</sup>       |
|          |                                                      | 1.446      | 1.58                 |                                 |                                    |       |      |                                                 | LDA+PAW <sup>177</sup>        |
| Sb-Se-Br |                                                      | 0.23       | 0.47                 |                                 |                                    |       |      |                                                 | NCPP-PBE <sup>201</sup>       |
| Sb-Se-I  |                                                      | 1.67       | 2.06                 |                                 |                                    |       |      |                                                 | EPM <sup>199</sup>            |
|          |                                                      | 1.86       | 2.23                 | 0.54                            | 0.58                               | 5.26  | 3.23 |                                                 | HSE06-SOC <sup>198</sup>      |
|          | <i>Pnma</i> (62)                                     | 2.03       | 1.29                 | 0.59                            | 4.37                               |       |      | 43.94                                           | QSGW-SOC <sup>198</sup>       |
|          |                                                      | 1.16       |                      | 0.082                           | 0.164                              |       |      |                                                 | PAW-PBE-SOC <sup>171</sup>    |
|          |                                                      | 1.62       | 1.40                 | 0.52                            | 0.24                               |       |      |                                                 | EV-SOC <sup>173</sup>         |
|          |                                                      | 1.29       |                      |                                 |                                    |       |      |                                                 | SR-GGA <sup>211</sup>         |
|          |                                                      | 1.65       |                      | 0.35                            | 1.83                               |       |      |                                                 | NCPP-PBE&GW <sup>175</sup>    |
|          |                                                      | 1.75       | 1.96                 |                                 |                                    |       |      | 57.18                                           | HSE+SOC <sup>169</sup>        |
|          |                                                      | 1.62       |                      |                                 |                                    |       |      |                                                 | (GGA)E-V + SOC <sup>228</sup> |
|          |                                                      | 1.26       |                      |                                 |                                    |       |      |                                                 | LDA + PAW <sup>177</sup>      |
| Sb-Te-I  |                                                      | 0.89       |                      |                                 |                                    |       |      |                                                 | PAW-PBE <sup>179</sup>        |
|          | <i>C2/m</i>                                          | 1.20       | 1.29                 | 0.31                            | 1.59                               |       |      | 44.69                                           | HSE+SOC <sup>169</sup>        |
|          |                                                      | 0.90       |                      |                                 |                                    |       |      |                                                 | LDA + PAW <sup>177</sup>      |

|         |                         |      |                     |                      |      |      |      |                      |                                    |                                    |
|---------|-------------------------|------|---------------------|----------------------|------|------|------|----------------------|------------------------------------|------------------------------------|
|         |                         | 0.68 |                     |                      |      |      |      |                      | GGA-PBE + SOC <sup>203</sup>       |                                    |
|         |                         | 0.89 |                     |                      |      |      |      |                      | PBE <sup>179</sup>                 |                                    |
|         |                         | 1.82 |                     |                      |      |      |      |                      | PBE <sup>204</sup>                 |                                    |
|         |                         | 1.32 |                     |                      |      |      |      |                      | Empirical methods <sup>205</sup>   |                                    |
| Bi-O-F  | <i>P4/nmmS</i><br>(129) | 3.41 | 3.41                |                      |      |      |      |                      | SR-PBE <sup>184</sup>              |                                    |
|         |                         |      | 3.0                 | 3.0                  |      |      |      |                      |                                    | PBE <sup>183</sup>                 |
|         |                         |      | 3.07                | 3.07                 | 0.31 | 0.90 |      |                      |                                    | PBE-D3-SOC <sup>206</sup>          |
|         |                         |      | 4.18                | 4.18                 |      |      |      |                      |                                    | mBJ-SOC <sup>206</sup>             |
|         |                         |      | 4.18                |                      | 0.5  | 12.5 | 8.23 | 3.87                 |                                    | SR-PAW-HSE06-D3-SOC <sup>225</sup> |
|         |                         | 4.43 | 3.94                | 0.52                 | 2.35 |      |      | 102.1                | HSE+SOC <sup>169</sup>             |                                    |
|         |                         |      | 3.07                |                      |      |      |      |                      | PBE-GGA + vdW + SO <sub>206</sub>  |                                    |
| Bi-O-Cl | <i>P4/nmmS</i><br>(129) | 2.69 |                     |                      |      |      |      |                      | SR-PBE <sup>184</sup>              |                                    |
|         |                         |      | 2.60                |                      |      |      |      |                      |                                    | PBE <sup>183</sup>                 |
|         |                         |      | 2.63                |                      | 0.46 | 0.27 |      |                      |                                    | PBE-D3-SOC <sup>206</sup>          |
|         |                         |      | 3.72                |                      |      |      |      |                      |                                    | mBJ-SOC <sup>206</sup>             |
|         |                         |      | 3.37                |                      | 0.3  | 0.8  | 7.94 | 4.35                 |                                    | SR-PAW-HSE06-D3-SOC <sup>225</sup> |
|         | <i>P4/nmm</i>           | 3.29 | 3.80                | $m_e=0.39, m_h=1.33$ |      |      |      | 51.74 <sup>169</sup> | HSE+SOC <sup>169</sup>             |                                    |
|         |                         | 2.63 |                     |                      |      |      |      |                      | PBE-GGA + D3, HSE <sup>180</sup>   |                                    |
|         |                         | 3.66 |                     |                      |      |      |      |                      | PBE-GGA + vdW + SO <sub>206</sub>  |                                    |
|         |                         | 2.38 |                     |                      |      |      |      |                      | PBE + PAW + SO <sup>182</sup>      |                                    |
| Bi-O-Br | <i>P4/nmmS</i><br>(129) | 2.21 |                     |                      |      |      |      |                      | SR-PBE <sup>184</sup>              |                                    |
|         |                         |      | 2.24                |                      |      |      |      |                      |                                    | PBE <sup>183</sup>                 |
|         |                         |      | 2.11                |                      | 5.68 | 0.2  |      |                      |                                    | PBE-D3-SOC <sup>206</sup>          |
|         |                         |      | 2.93                |                      |      |      |      |                      |                                    | mBJ-SOC <sup>206</sup>             |
|         |                         |      | 2.82                |                      | 0.3  | 0.7  | 7.55 | 4.65                 |                                    | SR-PAW-HSE06-D3-SOC <sup>225</sup> |
|         | <i>P4/nmm</i>           | 2.86 | 3.09                | $m_e=0.36, m_h=1.72$ |      |      |      | 44.62                | HSE+SOC <sup>169</sup>             |                                    |
|         |                         | 2.11 |                     |                      |      |      |      |                      | PBE-GGA + D3, HSE <sup>180</sup>   |                                    |
|         |                         | 3.08 |                     |                      |      |      |      |                      | PBE-GGA + vdW + SO <sub>206</sub>  |                                    |
| Bi-O-I  | <i>P4/nmmS</i><br>(129) | 1.38 |                     | 0.37                 | 3.75 |      |      |                      | PAW-PBE-SOC <sup>171</sup>         |                                    |
|         |                         |      | 1.62                |                      |      |      |      |                      |                                    | SR-PBE <sup>184</sup>              |
|         |                         |      | 1.63                |                      |      |      |      |                      |                                    | PBE <sup>183</sup>                 |
|         |                         |      | 1.46                | 1.49                 | 6.34 | 0.54 |      |                      | 46.32                              | PBE-D3-SOC <sup>206</sup>          |
|         |                         |      | 2.11                |                      |      |      |      |                      |                                    | mBJ-SOC <sup>206</sup>             |
|         |                         | 2.00 |                     |                      | 1.9  | 7.03 | 5.03 |                      | SR-PAW-HSE06-D3-SOC <sup>225</sup> |                                    |
| Bi-S-Cl |                         | 0.74 | 1.1                 |                      |      |      |      |                      | SCPM <sup>197</sup>                |                                    |
|         |                         | 1.40 | 1.54                |                      |      |      |      |                      | NCPP-PBE <sup>201</sup>            |                                    |
|         |                         | 1.6  | 1.9                 |                      |      |      |      |                      | FLAPW-GGA <sup>190</sup>           |                                    |
|         |                         | 1.5  |                     |                      |      |      |      |                      | FLAPW-GGA <sup>189</sup>           |                                    |
| Bi-S-Cl |                         | 0.74 | 1.1                 |                      |      |      |      |                      | SCPM <sup>197</sup>                |                                    |
|         |                         | 1.40 | 1.54                |                      |      |      |      |                      | NCPP-PBE <sup>201</sup>            |                                    |
|         |                         | 1.6  | 1.9                 |                      |      |      |      |                      | FLAPW-GGA <sup>190</sup>           |                                    |
|         |                         | 1.5  |                     |                      |      |      |      |                      | FLAPW-GGA <sup>189</sup>           |                                    |
|         | <i>Pnma</i>             |      | 1.98 <sup>169</sup> | 0.51                 | 2.91 |      |      | 37.53                |                                    |                                    |
| Bi-S-Br | <i>Pnma</i> (62)        | 1.39 | 1.55                |                      |      |      |      |                      | SCPM <sup>197</sup>                |                                    |
|         |                         | 1.32 | 1.35                | 0.24                 | 6.21 |      |      | 30.10                | PAW-PBE-SOC <sup>171</sup>         |                                    |
|         |                         | 1.21 | 1.39                |                      |      |      |      |                      | NCPP-PBE <sup>201</sup>            |                                    |
|         | <i>Pnma</i>             |      | 1.89 <sup>169</sup> | $m_e=0.52, m_h=3.73$ |      |      |      | 35.75                |                                    |                                    |
| Bi-S-I  |                         | 1.5  | 1.65                |                      |      |      |      |                      | SCPM <sup>197</sup>                |                                    |
|         | <i>Pnam</i> (62)        | 1.18 | 1.32                | 0.53                 | 4.79 |      |      | 29.59                | PAW-PBE-SOC <sup>171</sup>         |                                    |
|         | <i>Pnma</i> (62)        | 1.78 | 1.82                | 0.68                 | 0.36 | 6.4  | 4.9  | 36.8                 | HSE06-SOC <sup>68</sup>            |                                    |
|         |                         | 1.88 |                     |                      |      |      |      |                      | PAW-PBE <sup>179</sup>             |                                    |

|          |                  |       |      |                      |      |     |     |       |                                 |
|----------|------------------|-------|------|----------------------|------|-----|-----|-------|---------------------------------|
|          |                  | 1.39  | 1.55 |                      |      |     |     |       | NCPP-PBE <sup>201</sup>         |
|          |                  | 1.57  |      |                      |      |     |     |       | FLAPW-GGA <sup>188</sup>        |
|          | <i>Pnma</i>      | 1.66  | 1.87 | $m_c=0.45, m_h=1.72$ |      |     |     | 37.81 | HSE+SOC <sup>169</sup>          |
|          |                  | 1.88  |      |                      |      |     |     |       | PBE <sup>179</sup>              |
| Bi-Se-Cl |                  | 0.27  | 0.45 |                      |      |     |     |       | SCPM <sup>197</sup>             |
|          | <i>Pnma</i>      | 1.45  | 1.47 | $m_c=0.46, m_h=2.65$ |      |     |     | 20.38 | HSE+SOC <sup>169</sup>          |
| Bi-Se-Br |                  | 0.87  | 0.97 |                      |      |     |     |       | SCPM <sup>197</sup>             |
|          |                  | 1.14  | 1.25 |                      |      |     |     |       | NCPP-PBE <sup>201</sup>         |
|          | <i>Pnma</i>      | 1.45  | 1.48 | $m_c=0.44, m_h=2.25$ |      |     |     | 34.59 | HSE+SOC <sup>169</sup>          |
| Bi-Se-I  |                  | 0.8   | 1.15 |                      |      |     |     |       | SCPM <sup>197</sup>             |
|          | <i>Pnma</i> (62) | 0.91  | 1.03 | 0.25                 | 5.89 |     |     | 26.83 | PAW-PBE-SOC <sup>171</sup>      |
|          | <i>Pnma</i> (62) | 1.50  | 1.60 | 0.51                 | 0.28 | 6.2 | 5.0 | 35.8  | HSE06-SOC <sup>68</sup>         |
|          |                  | 0.57  | 0.52 |                      |      |     |     |       | NCPP-PBE <sup>201</sup>         |
|          |                  | 1.35  |      |                      |      |     |     |       | FLAPW-GGA <sup>50</sup>         |
|          | <i>Pnma</i>      | 1.32  | 1.48 | $m_c=0.42, m_h=2.39$ |      |     |     | 35.05 | HSE+SOC <sup>169</sup>          |
| Bi-Te-Cl |                  | 1.38  |      |                      |      |     |     |       | PAW-PBE <sup>179</sup>          |
|          |                  | 0.868 |      |                      |      |     |     |       | FLAPW-LDA-GW-SOC <sup>207</sup> |
|          | P3m1             | 1.20  | 1.33 |                      |      |     |     |       | HSE+SOC <sup>169</sup>          |
|          |                  | 1.20  |      |                      |      |     |     |       | PBE + UPPW <sup>192</sup>       |
|          |                  | 0.67  |      |                      |      |     |     |       | PBE + SOC <sup>208</sup>        |
|          | P63mc            | 1.38  |      |                      |      |     |     |       | PBE <sup>179</sup>              |
| Bi-Te-Br |                  | 1.09  |      |                      |      |     |     |       | PAW-PBE <sup>179</sup>          |
|          |                  | 1.09  |      |                      |      |     |     |       | FLAPW-PBE <sup>156</sup>        |
|          |                  | 0.28  |      |                      |      |     |     |       | FLAPW-PBE-SOC <sup>156</sup>    |
|          |                  | 0.65  |      |                      |      |     |     |       | FLAPW-LDA-GW-SOC <sup>207</sup> |
|          | P3m1             | 1.10  |      |                      |      |     |     |       | PBE + UPPW <sup>192</sup>       |
|          |                  | 0.53  |      |                      |      |     |     |       | PBE <sup>179</sup>              |
|          |                  | 0.59  |      |                      |      |     |     |       | PBE <sup>208</sup>              |
|          |                  | 1.09  |      |                      |      |     |     |       | PBE <sup>194</sup>              |
| Bi-Te-I  |                  | 1.24  |      |                      |      |     |     |       | PAW-PBE <sup>179</sup>          |
|          |                  | 0.43  |      |                      |      |     |     |       | PAW-PBE-SOC <sup>193</sup>      |
|          |                  | 0.21  |      |                      |      |     |     |       | PAW-PBE-D2-SOC <sup>193</sup>   |
|          |                  | 0.17  |      |                      |      |     |     |       | PAW-PBESol-SOC <sup>195</sup>   |
|          |                  | 1.2   |      |                      |      |     |     |       | FLAPW-PBE <sup>202</sup>        |
|          |                  | 0.28  |      |                      |      |     |     |       | FLAPW-PBE-SOC <sup>202</sup>    |
|          |                  | 0.4   |      |                      |      |     |     |       | FLAPW-LDA-GW-SOC <sup>207</sup> |
|          | P3m1             | 0.90  |      |                      |      |     |     |       | HSE+SOC <sup>169</sup>          |
|          |                  | 0.80  |      |                      |      |     |     |       | PBE + UPPW <sup>192</sup>       |
|          |                  | 0.90  |      |                      |      |     |     |       | GGA+SOC <sup>203</sup>          |
|          |                  | 0.41  |      |                      |      |     |     |       | PBE <sup>208</sup>              |
|          |                  | 0.48  |      |                      |      |     |     |       | PBE <sup>194</sup>              |
|          |                  | 0.31  |      |                      |      |     |     |       | LDA + mBJ + SOC <sup>209</sup>  |
|          |                  | 1.24  |      |                      |      |     |     |       | PBE <sup>179</sup>              |

Table S2. BiOX (X = Cl, Br, I) and their photocatalytic applications.

|                                         | Samples                                                                                                | Photocatalytic applications                                                                     | Range irradiation      | Synthetic procedures                                       | Ref. |
|-----------------------------------------|--------------------------------------------------------------------------------------------------------|-------------------------------------------------------------------------------------------------|------------------------|------------------------------------------------------------|------|
| 1D template<br>Nanowire                 | BiOCl nanofibers                                                                                       | Completely RhB degraded within 60 min                                                           | UV                     | electro-spinning                                           | 356  |
|                                         | BiOCl fibers                                                                                           | 75% MO mineralization in 110 min                                                                | UV                     | solvothermal synthesis (ethanol)                           | 370  |
|                                         | BiOCl nanowire arrays                                                                                  | Almost 100% RhB degradation within 130 min                                                      | UV                     | sol-gel                                                    | 367  |
| 2D intrinsic nanostructures             | BiOCl plates                                                                                           | Completely MO degradation within 10 min                                                         | UV                     | hydrolysis                                                 | 260  |
|                                         | BiOCl nanosheets                                                                                       | About 2 times higher RhB photodegradation rate than that on P25                                 | UV                     | hydrolysis                                                 | 340  |
|                                         |                                                                                                        | About 99% MO degradation within 45 min                                                          | UV                     | hydrothermal synthesis                                     | 366  |
|                                         | BiOCl nanoplates                                                                                       | Completely RhB disappearance within 8 min                                                       | Visible light          | mannitol-assisted hydrothermal synthesis                   | 373  |
|                                         | BiOCl lamellae                                                                                         | Good catalytic activity and selectivity in the oxidative coupling of the methane (OCM) reaction | ultrasonic irradiation | sonochemical method                                        | 414  |
|                                         | BiOBr lamellas                                                                                         | Completely RhB degraded within 30 min                                                           | Visible light          | hydrolysis                                                 | 337  |
|                                         |                                                                                                        | 96% MO degraded within 120 min                                                                  | Visible light          | hydrothermal synthesis                                     | 358  |
|                                         | BiOI nanosheets                                                                                        | 7 times higher photoactivity than that on irregular BiOI                                        | Visible light          | thermal annealing                                          | 368  |
| BiOX (X = Cl, Br, I) nanosheets         | 95.9% sodium pentachlorophenate (Na-PCP) degradation on BiOI within 1 h following BiOI > BiOBr > BiOCl | Xe-lamp                                                                                         | hydrolysis             | 332                                                        |      |
| 3D assembled hierarchical architectures | BiOX (X = Cl, Br, I) nanoplate microspheres                                                            | 80% MO degraded on BiOI within 3 h with the order BiOI > BiOBr > BiOCl                          | Visible light          | solvothermal synthesis (ethylene glycol)                   | 331  |
|                                         | BiOX (X = Cl, Br, I) hierarchical architectures                                                        | Completely MO degradation on BiOI within 60 min                                                 | UV-Vis                 | solvothermal synthesis (2-methoxyethanol, ethylene glycol) | 372  |
|                                         | BiOCl porous nanospheres                                                                               | Almost 100% RhB degraded within 2 h                                                             | Visible light          | solvothermal synthesis (ethylene glycol)                   | 341  |
|                                         | BiOCl nano-flowers                                                                                     | Completely MO degradation within 10 min                                                         | UV                     | solvothermal synthesis (pirydyne)                          | 350  |
|                                         | BiOCl hierarchical architectures                                                                       | Completely degrade RhB within 60 min                                                            | UV                     | solvothermal synthesis (ethylene glycol)                   | 362  |
|                                         | BiOCl hierarchical self-assemblies                                                                     | 90.2% RhB degraded within 50 min                                                                | UV                     | hydrothermal synthesis                                     | 343  |
|                                         | BiOCl micro-flowers                                                                                    | 99.3% RhB degraded within 15 min                                                                | Visible light          | hydrothermal synthesis (glycerol + H <sub>2</sub> O)       | 353  |
|                                         | BiOCl hierarchical flowers                                                                             | 90% MO degraded after 1 h                                                                       | simulated sunlight     | sonochemical route                                         | 360  |
|                                         | BiOCl 3D desert roses                                                                                  | Completely RhB degraded within 20 min                                                           | Visible light          | Refluxing method                                           | 415  |
|                                         | BiOCl nano-flowers                                                                                     | Completely RhB degradation within 50 min                                                        | Visible light          | hydrolysis                                                 | 348  |
|                                         | BiOCl 3D flowers                                                                                       | 100% RhB degraded within 80 min                                                                 | Visible light          | solution oxidation process                                 | 347  |
|                                         | BiOCl sub-microcrystals                                                                                | 99.5% RhB decomposed within 75 min                                                              | UV                     | hydrolysis                                                 | 60   |
|                                         | BiOBr nanoplate microspheres                                                                           | Nearly 30% NO removal within 10 min                                                             | Visible light          | solvothermal synthesis (ethylene glycol)                   | 346  |
|                                         | BiOBr                                                                                                  | 100% tetrabromobisphenol A decomposed within 15 min                                             | simulated              | solvothermal                                               | 355  |

|                                |                                                              |                    |                                                        |     |
|--------------------------------|--------------------------------------------------------------|--------------------|--------------------------------------------------------|-----|
| microspheres                   |                                                              | sunlight           | synthesis (ethylene glycol)                            |     |
|                                | 99% phenol decomposed within 80 min                          | UV                 | microwave-assisted solvothermal synthesis (DEG)        | 342 |
|                                | 90% <i>Micrococcus lylae</i> inactivated after 6 h           | fluorescent light  | solvothermal synthesis (TEG)                           | 352 |
|                                | 95% RhB degraded within 40 min                               | Visible light      | solvothermal synthesis (isopropanol + ethylene glycol) | 364 |
|                                | Higher MO degradation than that on BiOBr bulk plates         | Visible light      | solvothermal synthesis (ethylene glycol)               | 361 |
| BiOBr 3D microspheres          | Toluene conversion rate 2-fold larger than that on P25       | simulated sunlight | solvothermal synthesis (ethanol)                       | 369 |
| BiOBr mesoporous microspheres  | Nearly 100% bisphenol A degradation within 90 min            | simulated sunlight | solvothermal synthesis (ethanol)                       | 359 |
| BiOBr porous nanospheres       | RhB completely degraded within 105 min                       | Visible light      | solvothermal synthesis (ethylene glycol)               | 363 |
| BiOBr hollow microspheres      | 100% RhB degraded in 15 min and 90% Cr(VI) reduced in 20 min | Visible light      | solvothermal synthesis (2-methoxyethanol)              | 354 |
| BiOBr micro-flowers            | 92.5% methylene blue (MB) degraded for 4.5 h                 | Visible light      | solvothermal synthesis (ethylene glycol)               | 365 |
| BiOBr fullerene-like eggshells | Over 95% RhB degraded within 25 min                          | Visible light      | ultrasound reaction and heating synthesis              | 416 |
| BiOI hierarchical structures   | MO completely degraded within 50 min                         | Visible light      | hydrothermal synthesis                                 | 345 |
| BiOI hollow microspheres       | 92% MO degraded within 3 h                                   | Visible light      | solvothermal synthesis (ethylene glycol)               | 351 |
| BiOI microspheres              | 94% tetracycline hydrochloride decomposed within 2 h         | Visible light      | direct precipitation                                   | 344 |
|                                | 97% phenol decomposed within 4 h                             | Visible light      | chemical bath                                          | 349 |
| BiOI micro-flowers             | 80% RhB degraded within 4 h                                  | Visible light      | solvothermal synthesis (ethylene glycol)               | 383 |
|                                | 100% RhB degraded within 2 h                                 | Visible light      | direct precipitation                                   | 360 |

Table S3. Electrical properties of pnictide chalcogenides

| Compound | Specific resistivity, $\Omega\text{-cm}$                              | Charge carrier mobility, $\text{cm}^2\text{V}^{-1}\text{sec}^{-1}$                              | Ref      |
|----------|-----------------------------------------------------------------------|-------------------------------------------------------------------------------------------------|----------|
| AsSI     | $>10^{13}$ (at room temperature)                                      |                                                                                                 | 291      |
|          | $10^{16}$ to $10^{12}$ (decreases with iodine concentration increase) |                                                                                                 | 292      |
| AsSBr    | $>3\cdot 10^{14}$ (for 60 at. % of sulphur and 3-9 at % of bromine)   |                                                                                                 | 293      |
|          | $10^{15}$ to $10^{12}$ (at 20 °C)                                     |                                                                                                 | 72       |
| AsSeBr   | $10^{13}$ to $10^{11}$ (decreases with Br concentration increase)     |                                                                                                 | 72       |
| AsTeI    | $10^3$ (low iodine content) to $10^8$ (high iodine content)           | 0.08 (at room temperature)                                                                      | 295      |
|          |                                                                       | 0.12 (at 90°C)                                                                                  | 295      |
|          |                                                                       | $10^{-2}$ to $10^{-1}$ ( $\text{As}_{50}\text{Te}_{50-x}\text{I}_x$ ( $x = 0, 2, 20$ ) glasses) | 301      |
|          |                                                                       | 0.08 ( $\text{As}_{53}\text{Te}_{43}\text{I}_4$ glass)                                          | 295, 304 |
| AsTeBr   |                                                                       | 0.01 (at room temperature)                                                                      | 295      |
|          |                                                                       | 0.10 (at 90°C)                                                                                  | 295      |
| SbSI     | $10^{10}$ to $10^7$ (glasses)                                         |                                                                                                 | 72       |
|          |                                                                       | 50 to 100                                                                                       | 308      |
| SbSBr    | $10^7$ (crystal phase)<br>$10^{10}$ (glass phase)                     |                                                                                                 | 309      |
|          |                                                                       |                                                                                                 |          |
| SbSeI    | $10^8$ (at room temperature)                                          |                                                                                                 | 143      |
| SbSeBr   | $10^7$                                                                |                                                                                                 | 311      |
| SbTeI    |                                                                       | 1.01                                                                                            | 312      |
| BiOCl    | $10^{10}$ to $10^{13}$<br>$>10^{15}$ (<200K)                          |                                                                                                 | 314      |
|          |                                                                       |                                                                                                 | 317      |
| BiOI     | $>10^{15}$ (<200K)                                                    |                                                                                                 | 317      |
| BiOBr    | $>10^{15}$ (<200K)                                                    |                                                                                                 | 317      |
| BiSI     | $10^8$ to $10^9$ (Needle-like structures)                             |                                                                                                 | 320      |
| BiSBr    | $10^3$ to $10^4$                                                      |                                                                                                 | 308      |
| BiSeI    | $\sim 10^{10}$ to $10^6$ (decreases with temperature increase)        |                                                                                                 | 45       |
| BiTeI    |                                                                       | 528 (at 77K)                                                                                    | 65       |
|          |                                                                       | 242 (at 300K)                                                                                   |          |
| BiTeBr   |                                                                       | 1450 (at 77K)                                                                                   | 65       |
|          |                                                                       | 310 (at 300K)                                                                                   |          |

## Additional references for Tables S1 and S2.

413. H. Akkus and A. Mamedov, *Open Physics*, 2007, **5**, 25.  
414. J. Geng, W.-H. Hou, Y.-N. Lv, J.-J. Zhu and H.-Y. Chen, *Inorg. Chem.*, 2005, **44**, 8503-8509.  
415. G. Cheng, J. Xiong and F. J. Stadler, *New J. Chem.*, 2013, **37**, 3207-3213.  
416. C. Deng and H. Guan, *Mater. Lett.*, 2013, **107**, 119-122.
